1 **Generation of a novel SARS-CoV-2 sub-genomic RNA due to the R203K/G204R variant**  
2 **in nucleocapsid**

3

4 *Running title: SARS-CoV-2 variant changes protein and RNA level*

5

6 Shay Leary<sup>1¶</sup>, Silvana Gaudieri<sup>1,2,3¶</sup>, Matthew D. Parker<sup>4¶</sup>, Abha Chopra<sup>1</sup>, Ian James<sup>1</sup>, Suman  
7 Pakala<sup>3</sup>, Eric Alves<sup>2</sup>, Mina John<sup>1,5</sup>, Benjamin B. Lindsey<sup>6,7</sup>, Alexander J Keeley<sup>6,7</sup>, Sarah L.  
8 Rowland-Jones<sup>6,7</sup>, Maurice S. Swanson<sup>8</sup>, David A. Ostrov<sup>9</sup>, Jodi L. Bubenik<sup>8</sup>, Suman Das<sup>3</sup>,  
9 John Sidney<sup>10</sup>, Alessandro Sette<sup>10,11</sup>, COVID-19 Genomics Consortium UK, Thushan I. de  
10 Silva<sup>6,7\*</sup>, Elizabeth Phillips<sup>1,3\*</sup>, Simon Mallal<sup>1,3##\*</sup>

11

12 <sup>1</sup>Institute for Immunology and Infectious Diseases, Murdoch University, Murdoch, Western  
13 Australia, Australia.

14 <sup>2</sup>School of Human Sciences, University of Western Australia, Crawley, Western Australia,  
15 Australia.

16 <sup>3</sup>Division of Infectious Diseases, Department of Medicine, Vanderbilt University Medical  
17 Center, Nashville, Tennessee, USA.

18 <sup>4</sup>Sheffield Biomedical Research Centre, Sheffield Bioinformatics Core, The University of  
19 Sheffield, Sheffield, UK.

20 <sup>5</sup>Department of Clinical Immunology, Royal Perth Hospital, Perth, Western Australia,  
21 Australia.

22 <sup>6</sup>Sheffield Teaching Hospitals NHS Foundation Trust, Sheffield, UK.

23 <sup>7</sup>Department of Infection, Immunity and Cardiovascular Disease and The Florey Institute for  
24 Host-Pathogen Interactions, Medical School, University of Sheffield, Sheffield, UK.

25 <sup>8</sup>Department of Molecular Genetics and Microbiology, Center for NeuroGenetics and the  
26 Genetics Institute, University of Florida, Gainesville, Florida, USA.

27 <sup>9</sup>Department of Pathology, Immunology and Laboratory Medicine, University of Florida,  
28 Gainesville, Florida, USA.

29 <sup>10</sup>Center for Infectious Disease and Vaccine Research, La Jolla Institute for Immunology, La  
30 Jolla, California, USA.

31 <sup>11</sup>Department of Medicine, Division of Infectious Diseases and Global Public Health,  
32 University of California, San Diego, La Jolla, California, USA.

33

34 <sup>¶</sup>These authors contributed equally to this work.

35 <sup>\*</sup>These authors also contributed equally to this work.

36

37 <sup>#</sup>Corresponding author

38 Prof. Simon Mallal

39 **Email:** s.mallal@vumc.org

40

41 **Keywords:** COVID-19; SARS-CoV-2; homologous recombination; sub-genomic RNA

42 transcript; transcription-regulating sequence; viral polymorphism

43

44 **Abstract**

45 The adjacent amino acid polymorphisms in the nucleocapsid (R203K/G204R) of SARS-  
46 CoV-2 arose on the background of the spike D614G change and strains harboring these  
47 changes have become dominant circulating strains globally. Sequence analysis suggests that  
48 the three adjacent nucleotide changes that result in the K203/R204 variant have arisen by  
49 homologous recombination from the core sequence (CS) of the leader transcription-regulating  
50 sequence (TRS) as opposed to a step-wise mutation model. The resulting sequence changes  
51 generate a novel sub-genomic RNA transcript for the C-terminal dimerization domain. Deep  
52 sequencing data from 981 clinical samples confirmed the presence of the novel TRS-CS-  
53 dimerization domain RNA in individuals with the K203/R204 variant. Quantification of sub-  
54 genomic RNA indicates that viruses with the K203/R204 variant may also have increased  
55 expression of sub-genomic RNA from other open reading frames. The K203/R204 variant  
56 results in a novel sub-genomic RNA. The finding that homologous recombination from the  
57 TRS may have occurred since the introduction of SARS-CoV-2 in humans resulting in both  
58 coding changes and novel sub-genomic RNA transcripts suggests this as a mechanism for  
59 diversification and adaptation within its new host.

60

61 **Importance**

62 A major variant of the SARS-CoV-2 virus (R203K/G204R in the nucleocapsid) results in  
63 changes to the nucleocapsid at both the protein and RNA level. We show this variant likely  
64 arose by homologous recombination from the core sequence of the leader transcription-  
65 regulating sequence (TRS) elsewhere in the viral genome. This recombination event  
66 introduced a new TRS between the RNA binding and dimerization domains of nucleocapsid  
67 that generates a novel sub-genomic RNA transcript. Presence of the K203/R204 variant was

68 significantly associated with increased expression of nucleocapsid and sub-genomic RNA  
69 from other open reading frames. The mechanism by which the virus generates diversity,  
70 specifically how this KR variant arose and how it generated a novel major sub-genomic  
71 transcript is relevant to how future major shifts may arise and their potential functional  
72 implications.

73

74

## 75 **Background**

76 It is believed SARS-CoV-2 originated from a bat coronavirus transmitted to humans, likely  
77 via an intermediate host such as a pangolin, acquiring a furin-cleavage site in the process.  
78 This new motif allows cleavage at the boundary of the S1 and S2 domains of the spike  
79 protein in virus-producing cells (1). A SARS-CoV-2 variant in the spike protein, D614G (B.1  
80 lineage), emerged early in the epidemic and has rapidly become dominant in virtually all  
81 areas of the world where it has circulated (2). Several studies have shown this variant to be  
82 associated with higher viral RNA levels in the upper respiratory tract, higher titers in  
83 pseudoviruses in-vitro (2, 3) and increased infectivity (4, 5). More recently, emerging  
84 lineages from this genetic background harboring the additional N501Y mutation in the spike  
85 protein (B.1.1.7 – ‘UK variant’, B.1.351 – ‘South African variant’, P.1 (from B.1.1.28  
86 lineage) – ‘Brazilian variant’) have been identified with reported rapid local expansions of  
87 these viruses.

88

89 The diversification of coronaviruses can occur via point mutations and recombination events  
90 (6, 7) that can result in increased prevalence due to selective advantage related to increased  
91 infectiousness and transmission of the virus or by chance. Evidence of viral adaptation to  
92 selective pressures as a virus spreads among diverse human populations has important  
93 implications for the ongoing potential for changes in viral fitness over time, which in turn  
94 may impact transmissibility, disease pathogenesis and immunogenicity. Furthermore, the  
95 functional impact of new genetic changes need to be considered in the performance of  
96 diagnostic tests, ongoing public health measures to contain infection around the world and  
97 the development of universal vaccines and antiviral therapies.

98

99 Here we examined a variant of SARS-CoV-2 that emerged within the subset of sequences  
100 harboring the D614G variant and contains three adjacent nucleotide changes spanning two  
101 residues of the nucleocapsid protein (R203K/G204R; B.1.1 lineage) that has resulted in a  
102 novel sub-genomic RNA transcript. Sequence analysis suggests these changes are the result  
103 of homologous recombination from the core sequence (CS) of the leader transcription-  
104 regulating sequence (TRS). This event introduced a new TRS between the RNA binding and  
105 dimerization domains of nucleocapsid providing the template for the generation of a novel  
106 sub-genomic RNA transcript. Further novel sub-genomic RNA transcripts arising in  
107 association with incorporation of leader sequence and TRS were also observed, suggesting  
108 homologous recombination from this region as a potential mechanism for SARS-CoV-2  
109 diversification and adaptation within its new host.

110

111 **Results and Discussion**

112 **Adjacent nucleocapsid polymorphisms emerged from the existing spike protein D614G**  
113 **variant**

114 We utilized publicly available SARS-CoV-2 sequences from the GISAID database (available  
115 on the 24<sup>th</sup> of January 2021; [www.gisaid.org](http://www.gisaid.org)) to identify amino acid polymorphisms arising  
116 in global circulating forms of the virus in relation to region and time of collection. Of the  
117 455,774 circulating variants there were 29 amino acid polymorphisms present in >5% of the  
118 deposited sequences (of a total of 9413 sites; S1 Table) including the spike D614G variant  
119 (B.1 lineage) that emerged early in the pandemic and the adjacent R203K/G204R variants  
120 (B.1.1 lineage) in the nucleocapsid protein (8) that formed one of the main variants emerging  
121 from Europe in early 2020. As of the end of January 2021, the K203/R204 variant comprises  
122 37.4% of globally reported SARS-CoV-2 sequences (Fig 1) and almost exclusively occurs on  
123 the D614G genetic background (S2 Table).

124

125 Although the D614G change rapidly increased in prevalence in almost all regions, the  
126 prevalence rates of the K203/R204 subset of the D614G variant are variable in different  
127 geographic areas and over-time (Fig 1). For example, an almost complete replacement of  
128 D614 by G614 was noted in South America between March and April 2020 and a similar  
129 replacement pattern was seen with the K203/R204 variant most marked in Chile, Argentina  
130 and Brazil (9). A closer examination of the deposited sequences in the UK shows the  
131 K203/R204 variant increasing in prevalence early in 2020 but the second wave later in the  
132 year shows a shift in the proportion of deposited sequences with the R203/G204 subset of the  
133 D614G variant (B.1.177 lineage) until the recent appearance of the B.1.1.7 ‘UK variant’ that  
134 harbors the K203/R204 polymorphisms (S1 Fig and S2 Table); supporting a likely increased  
135 infectivity of this variant.

136

137 **Amino acid polymorphisms due to three adjacent nucleotide changes in the**  
138 **nucleocapsid likely due to homologous recombination**

139 Of the publicly available sequences examined with the two amino acid polymorphisms  
140 K203/R204, all showed the three adjacent nucleotide changes from AGG GGA to AAA  
141 CGA. There was no differential codon usage for the K203/R204 variant in the database.  
142 However, there was evidence of low frequency alternative codon usage for arginine at 203  
143 (AGA) for the R203/G204 variant and for lysine (AAG) at 203 for the K203/G204 variant  
144 (S3 Table). Overall, circulating variants that contain the intermediate codon as the consensus  
145 that could facilitate a single step from the AGG arginine codon to the AAA lysine codon at  
146 position 203 appear rare among captured variants to date (S3 Table). Furthermore, a K203  
147 polymorphism alone was seen in 0.3% and an R204 polymorphism alone seen in only 0.02%  
148 of sequences (S3 Table). The low frequency K203/L204 and K203/P204 variants are both  
149 one nucleotide step from the K203/R204 variant, have been deposited into the public  
150 databases (November 2020) well after the emergence of the K203/R204 variant (February  
151 2020) and accordingly likely arose from this genetic background.

152

153 The rapid emergence of closely linked polymorphisms in viruses can also reflect strong  
154 selection pressure on this region of the genome in which the original mutation incurred a  
155 replicative capacity, or other fitness cost, which could be restored by a linked compensatory  
156 mutation. Evidence for such adaptations with closely linked compensatory mutations are  
157 known to occur under host immune pressure as is well established for other RNA viruses  
158 such as HIV (10-12) and Hepatitis C virus (13). In the absence of anti-viral treatment, these  
159 viruses have such a high rate of viral replication, error-prone polymerases and lack associated  
160 proofreading, mismatch repair, and other nucleic acid repair pathways generating a swarm of



161 viral variants with ongoing recombination between variants (in the case of HIV) being  
162 generated continuously. As a result, selection pressure exerted by immune responses or other  
163 selective pressures effectively operate on each separate residue independently (12). In  
164 contrast, coronaviruses encode proofreading machinery and have a propensity to adapt by  
165 homologous recombination between viruses (6) rather than necessarily by classic stepwise  
166 individual mutations driven by selective pressures effectively operating on individual viral  
167 residues. Furthermore, a simulation based on the nucleocapsid genomic region and allowing  
168 up to 10 random mutations indicates the likelihood of observing three consecutive nucleotide  
169 changes is less than 0.0005. These findings argue against stepwise change of the nucleotides  
170 for the R203K/G204R variant.

171

172 The introduction of the AAACGA motif by homologous or heterologous recombination is a  
173 more parsimonious mechanistic explanation and would have immediately resulted in both an  
174 R to K change and adjacent G to R change at the positions 203 and 204, respectively. It is  
175 critical to determine if the introduction of the AAACGA motif has induced any replicative or  
176 other fitness change for the virus as a result of either structural or functional changes in the  
177 RNA or the concomitant change of amino acids from R203/G204 to K203/R204 and any  
178 related structural or functional impact on the nucleocapsid protein.

179

### 180 **SARS-CoV-2 itself as likely source for homologous recombination**

181 To identify possible viral sources for homologous recombination with SARS-CoV-2,  
182 we initially performed a search of the motif in the nucleocapsid in related beta coronaviruses  
183 from human and other species in the public databases and only found the presence of the  
184 R203/G204 combination. We performed a similar search in our metatranscriptome data  
185 generated from a cohort study consisting of 65 subjects of whom 43 had acute respiratory

186 infections and 22 were asymptomatic. From the data we assembled near complete and coding  
187 complete viral genomes of the Coronavirus (NL63 - alpha, OC43 - beta, 229E - alpha), RSV  
188 (A, B), Rhinovirus (A, B, C), Influenza (A - H3N2), and Bocavirus family. None of the alpha  
189 coronaviruses had the R203/G204 or K203/R204 combination or indeed any variation at  
190 these sites (n=14; sequence depth >3000). We then performed a search for stretches of  
191 similarity using varying window sizes (>14 base-pair (bp) including the motif) in all  
192 sequences. A 14bp window was selected as 14bp has been shown to be the minimum amount  
193 of homology required for homologous recombination in mammalian cells (14). No significant  
194 hits were identified. However, the AAACGA sequence encoding the K203/R204 amino acids  
195 overlaps with the CTAAACGAAC motif of the leader transcription-regulating sequences  
196 (TRS; core underlined) (15) of SARS-CoV-2 itself and this core sequence motif is also found  
197 near the start codon of the protein for surface glycoprotein (S), ORF3a, E, M, ORF6, ORF7a,  
198 ORF8, ORF10 and nucleocapsid, in keeping with its known roles in mediating template  
199 switching and discontinuous transcription (15).

200

201 **Deep sequencing confirms quasi-species with the leader sequence linked to known or**  
202 **introduced TRS region**

203 Discontinuous transcription of SARS-CoV-2 results in sub-genomic RNA (sgRNA)  
204 transcripts containing 5'-leader sequence-TRS-start codon-ORF-3'. These RNA transcripts  
205 should also be captured from reads generated from NGS platforms. We therefore reasoned we  
206 should be able to find such sequences within deep sequencing reads at the sites of known  
207 sub-genomic regions (corresponding to the ORFs) and adjacent to position 203/204 of the  
208 nucleocapsid in subjects infected with the K203/R204 variant but not in those with the  
209 R203/G204 variant (Fig 2).

210

211 We searched for sgRNAs in sequence data generated from n=981 patients with COVID-19  
212 based on the ARTIC network protocol ([www.artic.network/ncov-2019](http://www.artic.network/ncov-2019); Fig 2) and subsequent  
213 Nanopore sequencing in Sheffield, UK. As expected, the most frequent sgRNA transcripts in  
214 each subject, irrespective of variant, corresponded to the known regions containing the start  
215 codon of the SARS-CoV-2 proteins (Fig 3A). However, out of a total of 550 K203/R204  
216 sequences, 231 had evidence ( $\geq 1$  read containing leader sequence at the novel TRS site) of  
217 the non-canonical nucleocapsid sgRNA (42%) but only 1 out of a total of 431 R203/G204  
218 subjects had evidence of the novel sgRNA (likely a false positive as described in S2 Fig).

219

220 We confirmed the presence of the novel non-canonical nucleocapsid sgRNA in 27/45  
221 individuals with the K203/R204 variant but in none of 45 individuals with the R203/G204  
222 variant (Fisher test,  $p=5.0e-11$ ; S4 Table) from the sequence read archive (SRA) database  
223 ([www.ncbi.nlm.nih/sra](http://www.ncbi.nlm.nih/sra)). Interestingly, we also found the presence of 23 other non-canonical  
224 sgRNA transcripts with the 5'-leader-TRS-start codon-3' at low frequency in the 90 subjects  
225 (irrespective of variant) due to multiple adjacent changes to the consensus sequence across  
226 the genome generating new core TRS motifs (including with minor mismatches) (S4 Table).  
227 It should be noted that none of these changes are present in the consensus sequence of the  
228 SARS-CoV-2 genomes downloaded and represent low frequency quasispecies within  
229 individuals. It does, however, suggest other instances of the introduction of the core  
230 sequences from the leader TRS elsewhere in the SARS-CoV-2 genome.

231

232 **SARS-CoV-2 viruses with K203/R204 are not associated with greater hospitalization**  
233 **with COVID-19 or higher virus levels in the upper respiratory tract**

234 The same dataset from COVID-19 patients in Sheffield, UK, was used to explore whether the  
235 K203/R204 variant had any association with clinical outcome. The median age of this cohort

236 was 54 years (IQR 38 to 74) and 59.8% were female. Of these, 440 (44.9%) were  
237 hospitalized COVID-19 patients and 42 (4.3%) subsequently required critical care support. A  
238 multivariable logistic regression model including 203/204 status, age and sex showed no  
239 association of K203/R204 with hospitalization (OR 0.82, 95% confidence intervals (CI 0.58 –  
240 1.16),  $p=0.259$ ). As expected, higher age and male sex were significantly associated with  
241 hospitalization with COVID-19 (OR 1.09, 95% CI 1.08 – 1.11,  $p < 2e-16$  for age and OR  
242 4.47, 95% CI 3.13 – 6.43,  $p=2.91e-16$  for male sex). Male sex, but not age or 203/204 status,  
243 was associated with risk of critical care admission (S5 Table).

244

245 We explored whether K203/R204 was associated with greater virus levels in the upper  
246 respiratory tract as estimated by cycle threshold (CT) values from the diagnostic RT-PCR. As  
247 day of illness will impact CT value, we focused on a subset of the cohort ( $n=478$ ) where this  
248 information was available (all non-hospitalized patients, median symptom day 3, range 1 – 13  
249 days). Data were analyzed with sequences stratified by spike 614 and nucleocapsid 203/204  
250 status (D614/R203/G204, G614/R203/G204 and G614/K203/R204). Multivariable linear  
251 regression models showed no impact of G614/K203/R204 compared to G614/R203/G204  
252 status on CT values ( $p=0.83$ , S6B Table), but as expected, later day of symptom onset was  
253 significantly associated with higher CT values, therefore lower viral load (S6 Table,  
254  $p=2.05E-05$ ). Consistent with recent findings (2), presence of a spike D614G variant was  
255 significantly associated with lower CT values (higher viral loads) in the same subset of  
256 individuals, even when day of illness at sampling is included in the model (S6A Table,  
257 D614/R203/G204 vs G614/R203/G204,  $p=0.00011$ , Fig 4A & B).

258

259 **SARS-CoV-2 viruses with K203/R204 have evidence of higher sub-genomic RNA**  
260 **expression**

261 We hypothesized that the amount of sgRNA at each of the ORF TRS positions in the SARS-  
262 CoV-2 genome in ARTIC nanopore sequencing data could serve as a proxy for expression  
263 levels of each of the ORFs due to their positions in the amplicons (Fig 2). To test this  
264 hypothesis we developed a tool, periscope (16), which quantifies the number of sgRNA and  
265 genomic RNA reads at each ORF TRS position in ARTIC network nanopore sequencing  
266 data. We applied periscope to the 981 sequences in the Sheffield validation dataset. To  
267 control for the sequencing depth differences evident between amplicons, we determined the  
268 amplicon that shares the 3' primer with the sgRNA reads and used the total count of genomic  
269 RNA at this amplicon to calculate the proportion of sgRNA for each ORF. The N ORF  
270 sgRNA is expressed at high levels in all samples. ORF10 sgRNA was absent as others have  
271 shown (17). A significant increase in sgRNA levels for several ORFs in samples with  
272 K203/R204 compared to R203/G204 samples is apparent (Fig 3B). N is the most striking  
273 example (Fig 3C, Mann-Whitney U test p value, adjusted for multiple testing  $p = 2.06e-37$ ),  
274 but sgRNA from ORFs E, M and ORF6 are also significantly increased. There is no  
275 significant difference in genomic RNA levels (Fig 3D, normalized to total mapped reads)  
276 between these two groups.

277

278 As discussed above, the K203/R204 variants appear to have emerged within the subset of  
279 SARS-CoV-2 sequences with a D614G variant in the spike protein, which has recently been  
280 associated with infections with a higher viral load in the upper respiratory tract. To explore  
281 whether the differences between K203/R204 and R203/G204 sequences in sgRNA quantities  
282 were due to D614 compared to G614 variant differences, we repeated the comparisons  
283 following further stratification of sequences. Interestingly, G614/R203/G204 variants showed  
284 *lower* total sgRNA expression than D614/R203/G204 samples (S3 Fig). Of note, sgRNA for  
285 spike (S), membrane (M) and envelope (E) ORFs were significantly higher in samples with

286 D614/R203/G204 compared to those with G614/R203/G204 (adjusted p values  $1.02e-4$  for S,  
287  $0.0495$  for M and  $0.00696$  for E). Total sgRNA in G614/K203/R204-containing samples was  
288 still significantly higher than in G614/R203/G204 samples (S3A Fig, Mann-Whitney U test p  
289 value, adjusted for multiple testing  $p = 3.5e-6$ ). Similar increases in some individual ORF  
290 sgRNA quantities in G614/K203/R204 compared to G614/R203/G204 sequences were also  
291 seen, most notably for nucleocapsid (S3B Fig, adjusted p value  $1.34e-12$ ).

292

293 To ensure that the increase in sgRNA in K203/R204-containing sequences was not due to  
294 confounding by differences in sampling date compared to date of symptom onset, we  
295 evaluated the impact of K203/R204 and day of illness on sgRNA expression in a  
296 multivariable linear regression model using the subset of 478 sequences described above  
297 (stratified by D614/R203/G204, G614/R203/G204 and G614/K203/R204 status). Higher  
298 sgRNA levels were significantly associated with later day from symptom onset (S7 Table,  
299  $p=9.9E-08$ ). G614/R203/G204 compared to D614/R203/G204 was again associated with a  
300 reduction in sgRNA levels ( $p=0.011$ , S7A Table), whereas a K203/R204 change on the  
301 background of spike G614-containing sequences was associated with a significant increase in  
302 sub-genomic RNA ( $p=4.51E-05$ , S7B Table). Spike canonical sub-genomic RNA was higher  
303 in D614/R203/G204 samples, whereas nucleocapsid canonical sub-genomic RNA was higher  
304 in G614/K203/R204 samples (Fig 4C and D, S3 Fig).

305

### 306 **Potential impact of introduced TRS sequences on RNA structure**

307 Modeling of the region around the mRNA encoding position 203 and 204 of the nucleocapsid  
308 using RNAfold (18) predicts the presence of a three-way junction in the RNA (S4 Fig),  
309 which was also predicted using Junction-Explorer (19). Three-way junction motifs are  
310 common throughout biology and are found both in pure RNAs, such as riboswitches or

311 ribozymes, and in RNA-protein complexes, including the ribosome (20). RNA three-way  
312 junctions are often stabilized via terminal loop interactions with distant tertiary contacts  
313 while the junctions act like flexible hinges. These attributes allow these structures to sample  
314 unusual conformational spaces and they often form platforms for interactions with other  
315 molecules such as proteins, RNAs or small molecule ligands (20), and these folds often have  
316 an essential role in either the function or assembly of the molecules in which they are  
317 contained.

318

319 RNAfold predicts the mutation from AGGGGA to AAACGA strongly disrupts this structure  
320 as the lengths of the predicted helices and each of the junctions are altered and the stability of  
321 Helix 2 is undermined (S4 Fig). A comparison of the two-modeled sequences using  
322 CHSalign (21) also indicates that none of the junctions are maintained. Given these  
323 widespread alterations, this modeling predicts that the AGGGGA to AAACGA mutation  
324 would have a strong impact on the local RNA structure of this region, and likely impacts the  
325 normal function of this three-way junction motif. Interestingly, the RNA modeling shown in  
326 S4 Fig also suggests that pairing of specific nucleotides to maintain these RNA structures  
327 may require the particular preferential codon usage by RG (AGGGGA) and KR (AAACGA)  
328 and be a contributory factor to preferential codon usage in RNA viruses more generally even  
329 in protein coding regions.

330

331 While it is not possible to determine the impact of this proposed structural alteration on  
332 SARS-CoV-2 without a defined function for this structure, there are precedents where minor  
333 changes in a three-way junction have large functional consequences for their host viruses. For  
334 example, Flaviviruses such as Dengue and West Nile virus utilize the host cell machinery to  
335 degrade viral genomes until they encounter structures near the 3' end that are resistant to

336 XRN1 5'-3' exonuclease (22). The resulting small flaviviral RNAs (sfRNAs) are non-coding  
337 RNAs that induce cytopathicity and pathogenicity. The resistance of sfRNA to XRN1 is  
338 dependent on the structure of a three-way junction and a single nucleotide change at the  
339 junction alters the fold sufficiently to prevent the accumulation of disease-related sfRNAs.  
340 Thus, small changes at the nucleotide level can have profound functional consequences for  
341 viral RNA three-way junctions.

342

343 **Lack of evidence that the RG to KR change at positions 203 and 204 of nucleocapsid**  
344 **was driven by HLA-restricted immune selective pressure**

345 Selection of viral adaptations to polymorphic host responses mediated by T cells, NK-cells  
346 and antibodies are well described for other RNA viruses such as HIV and HCV (12, 23).  
347 HIV-1 adaptations to human leucocyte antigen (HLA)-restricted T-cell responses have also  
348 been shown to be transmitted and accumulate over time (24, 25). As previously shown for  
349 SARS-CoV, T-cell responses against SARS-CoV-2 are likely to target the nucleocapsid (26).  
350 Notably, SARS-CoV-2 R203K/G204R polymorphisms modify the predicted binding of  
351 putative HLA-restricted T-cell epitopes containing these residues (S8 Table). One of the  
352 predicted T-cell epitopes is restricted by the HLA-C\*07 allele; and we therefore considered  
353 whether escape from HLA-C-restricted T-cell responses may conceivably confer a fitness  
354 advantage for SARS-CoV-2, particularly in European populations where HLA-C\*07 is  
355 prevalent and carried by >40% of the population ([www.allelefrequencies.net](http://www.allelefrequencies.net)). However,  
356 using HLA-C\*07:01 purified from the Steinlin cell line (IHWG ID: 9087; A\*01:01, B\*08:01  
357 and C\*07:01) and the anti-HLA Class I B123.2 mAb in inhibition assays we were not able to  
358 detect binding of either of the SARS-CoV-2 peptides SRGTSPARM or SKRTSPARM (S9  
359 Table). We therefore have, as yet, no evidence of any impact or selective advantage to the  
360 virus at the protein level of a change at position 203/204 from the RG to KR residues.



361

362 **SARS-CoV-2 and Host Adaptation: Implications for global viral dynamics,**  
363 **pathogenesis and immunogenicity**

364 Currently the possible functional effect(s) of the introduction of the AAACGA motif from the  
365 leader TRS into the RNA encoding position 203 and 204 of the nucleocapsid at the RNA and  
366 protein level are not known. TRS sites are usually intergenic and it has been assumed that  
367 recombination events at such sites are more likely to be viable. It has also been shown  
368 recently that recombination breakpoint hotspots in coronaviruses are more frequently co-  
369 located with TRS-B sites than expected (27). Our findings suggest that a novel TRS-B site  
370 can be introduced in a recombination breakpoint from the leader TRS, and that this can occur  
371 within an ORF and remain viable. The exact mechanism by which the AAA CGA codons  
372 could have been incorporated from the TRS-L into the nucleocapsid is not known but may  
373 have first required the AAACGA to be captured from the TRS-L and then for replication to  
374 be reinitiated at the nucleocapsid to generate a full-length genomic RNA.

375

376 The nucleocapsid protein is a key structural protein critical to viral transcription and  
377 assembly (28), suggesting that changes in this protein could either increase or decrease  
378 replicative fitness. The K203/R204 polymorphism is located between the RNA  
379 binding/serine-rich domains and the dimerization structural domain (S5 Fig) in a part of the  
380 protein that has not been characterized in terms of 3-dimensional structure. The sequence of  
381 this region is not similar enough to solved structures to allow prediction of the influence of  
382 the K203/R204 polymorphisms on the structure or function of the protein. However, it is  
383 known that SARS-CoV-2 is exquisitely sensitive to interferons and that it depends on the  
384 nucleocapsid and M proteins to maintain interferon antagonism (29, 30). Specifically the C  
385 terminus (aa 362 to 422) of the nucleocapsid, which is predicted to be expressed at higher

386 levels in those with the KR variant and novel sgRNA, has been shown to interact with the  
387 SPRY domain of TRIM25 disturbing its interaction with CARDs of RIG-I inhibiting RIG-I  
388 ubiquitination and Type 1 interferon signalling (31). Importantly the cells expressing the C-  
389 terminal nucleocapsid protein in that study produced lower viral titer, suggesting the  
390 incorporation of this protein into the nucleocapsid may reduce the formation of functional  
391 virus. This raises the possibility that any enhancement of inhibition of interferon signaling  
392 associated with the novel K203/R204 sgRNA may be offset by less efficient replication,  
393 potentially accounting for the lack of association with higher viral load in the upper  
394 respiratory tract and absence of epidemiologic evidence of increased transmission. It is also  
395 possible that the increase in sgRNA directly inhibits RIG-I signaling and downstream Type I  
396 interferon responses as has been described for Dengue serotype 2 (32). Finally the central  
397 region of coronavirus nucleocapsid (aa 117 to 268) has been shown to have RNA chaperone  
398 activity that enhances template switching and efficient transcription possibly accounting for  
399 the increase in sgRNA for the E and M proteins and ORF6 in KR-sequences compared to  
400 RG-sequences (33). Note we cannot exclude that the novel sgRNA may also use the  
401 downstream ATG in the ORF9c reading frame.

402

### 403 **Conclusion**

404 Marked viral diversity and adaptation of other RNA viruses such as HIV, HCV and influenza  
405 to host selective pressures have been a barrier to successful treatment and vaccination to date.  
406 Although SARS-CoV-2 is less diverse and adaptable, the D614G variant and the K203/R204  
407 variant on this genetic background have emerged by nucleotide mutation and homologous  
408 recombination respectively during its rapid, widespread global spread and do appear to have  
409 functional impact. It will therefore be critical to continue molecular surveillance of the virus  
410 and elucidate the functional consequences of any newly emerging viral genetic changes to

411 guide development of diagnostics, antivirals and universal vaccines and to target conserved  
412 and potentially less mutable SARS-CoV-2 elements. The ability of SARS-CoV-2 to  
413 introduce new TRS motifs throughout its genome with the potential to introduce novel sub-  
414 genomic RNA transcripts and coding changes in its proteins may add to these challenges.

415

## 416 **Materials and Methods**

### 417 **Study Design**

418 This study utilized deposited SARS-CoV-2 genomic sequences in public databases, with a  
419 further 981 Oxford Nanopore Technology genomes and clinical metadata from Sheffield,  
420 UK, as a validation set, to identify and map genetic variants and sub-genomic RNA  
421 transcripts across the genome. Accession numbers and links to datasets are in Supplementary  
422 Material.

423

### 424 **SARS-CoV-2 sequence generation from patients with COVID-19**

425 SARS-CoV-2 sequences, with matched clinical metadata, were generated using samples  
426 taken for routine clinical diagnostic use from 981 individuals presenting with COVID-19  
427 disease to Sheffield Teaching Hospitals NHS Foundation Trust, Sheffield, UK. This work  
428 was performed under approval by the Public Health England Research Ethics and  
429 Governance Group for the COVID-19 Genomics UK consortium (R&D NR0195).  
430 Following extraction, samples were processed using the ARTIC Network SARS-CoV-2  
431 protocol. After RT-PCR, SARS-CoV-2 specific PCR and library preparation with Oxford  
432 Nanopore LSK-109 and barcoding expansion packs NBD-104 and NBD-114 samples were  
433 sequenced on an Oxford Nanopore GridION X5 using R9.4.1D flow cells. Bases were called  
434 with either fast or high accuracy guppy with demultiplexing enabled and set to --require-  
435 both-ends. Samples were then analyzed using ARTIC Network pipeline v1.1.0rc1.

436

### 437 **SARS-CoV-2 sequence acquisition from public repositories**

438 Complete SARS-CoV-2 genome sequences were downloaded from the GISAID EpiCoV  
439 repository on 24<sup>th</sup> January, 2021 (<https://www.gisaid.org/>). The complete dataset of 455,774  
440 sequences with coverage across the genome were aligned in CLCbio Genomics Workbench  
441 12 (QIAGEN Bioinformatics) to the GenBank reference sequence NC\_045512.2. Aligned  
442 sequences were exported in FASTA format and imported into Visual Genomics Analysis  
443 Studio (VGAS), an in-house program for visualizing and analyzing sequencing data  
444 (<http://www.iiid.com.au/software/vgas>). The chronological appearance of the sequences was  
445 generated using the collection dates for each of the sequences. A small proportion of  
446 deposited sequences did not include information regarding specific collection date and as  
447 such were excluded from Fig 1. Of note, our current knowledge of the global circulating  
448 variants is dependent on the ability of laboratories in different countries to deposit full  
449 genome length SARS-CoV-2 sequences and may be subject to ascertainment bias. As such,  
450 the frequencies of specific variants shown may not reflect the size of the outbreak. However,  
451 the data does provide the opportunity to predict the presence of specific variants in areas  
452 given the known epidemiology within different countries and regions. A subset of subjects  
453 also had individual deep sequence reads deposited in the Sequence Read Archive (SRA) at  
454 [www.ncbi.nlm.nih/sra](http://www.ncbi.nlm.nih/sra). These sequence reads were downloaded and aligned as indicated  
455 above.

456

### 457 **Identification of amino acid substitutions**

458 Codon usage output allowed for identification of amino acid substitutions across the SARS-  
459 Cov-2 genome. A cut-off of 5% frequency within the consensus SARS-CoV-2 protein  
460 sequences was set to obtain the codon usage across all sequences and as shown in S1 Table.

461 The viral polymorphisms detected are present in viral variants sequenced using different NGS  
462 platforms (e.g. nanopore, Illumina) and the Sanger-based sequencing method making it  
463 unlikely that the new changes are sequence or alignment errors. In addition, different  
464 laboratories around the world have deposited sequences with these polymorphisms in the  
465 database and examination of individual sequences in the region failed to uncover obvious  
466 insertions/deletions likely representing alignment issues or homopolymer slippage.

467

#### 468 **HLA peptide binding prediction**

469 The region containing the adjacent amino acid polymorphisms in the nucleocapsid was  
470 divided into sliding windows of 8-14 amino acids. NetMHC 4.0  
471 (<http://www.cbs.dtu.dk/services/NetMHC/>) and NetMHCpan 4.0  
472 (<http://www.cbs.dtu.dk/services/NetMHCpan/>) with default settings were utilized to predict  
473 HLA-class I binding scores and binding differences across all HLA class-I alleles for the  
474 original 2003 SARS and current SARS-CoV-2 sequences harboring the R203/G204 and  
475 K203/R204 polymorphisms in the nucleocapsid (output listed in S8 Table).

476

#### 477 **HLA peptide binding assays**

478 MHC was purified from the Steinlin EBV transformed homozygous cell line (IHWG ID:  
479 9087; A\*01:01, B\*08:01 and C\*07:01) using the B123.2 (anti-HLA-B, C) and W6/32 (anti-  
480 class I) monoclonal antibodies, and classical MHC-peptide inhibition of binding assays  
481 performed, as previously described (34). To develop an HLA C\*07:01-specific binding  
482 assay, the IEDB was utilized to identify candidate peptides reported as HLA-C\*07:01  
483 epitopes or eluted ligands. One peptide (3424.0028; sequence IRSSYIRVL, *Macaca mulatta*  
484 and *Homo sapiens* DNA replication licensing factor MCM5 289-297) was radiolabeled and  
485 found in direct binding assays to yield a strong signal with as little as 0.5 nM MHC.

486 Subsequent inhibition of binding assays established that 3424.0028 bound with an affinity of  
487 0.21 nM. To establish that the putative assay was specific for C\*07:01, and not co-purified  
488 B\*08:01, two additional peptides previously reported as HLA-C\*07:01 ligands were also  
489 tested, with one found to bind with high affinity (IC<sub>50</sub> 67 nM) and the other with  
490 intermediate (IC<sub>50</sub> 1600 nM). At the same time, a panel of known B\*08:01 ligands were not  
491 found to have the capacity to inhibit binding of radiolabeled 3424.0028 (S9 Table). By  
492 contrast, when the same panel of peptides was tested in the previously validated B\*08:01  
493 assay (35), 3424.0028 was found to bind with about 1500-fold lower affinity, all of the  
494 known B\*08:01 ligands bound with IC<sub>50</sub>s <10 nM, and the C\*07:01 ligands with affinities  
495 >1000 nM.

496

#### 497 **Sub-genomic RNA classification & quantification in the Validation Dataset**

498 We developed a tool, “periscope” (v0.0.0), to classify and quantify sub-genomic RNA in the  
499 Sheffield ARTIC network Nanopore dataset (16). Briefly, this tool uses local alignment to  
500 identify putative sub-genomic RNA supporting reads and uses genomic reads from the same  
501 amplicon to normalize.

502

#### 503 **RNA structure modeling**

504 The RNAfold program from the ViennaRNA Web Server (<http://rna.tbi.univie.ac.at/>) was  
505 used for structural predictions using the default settings and the minimum free energy  
506 structures were acquired using the base-pairing probability color scheme. The Dot-bracket  
507 folding notations were obtained for each of the R203K/G204R sequences and used for  
508 Junction Explorer ([nature.njit.edu/biosoft/Junction-Explorer/](http://nature.njit.edu/biosoft/Junction-Explorer/)) and CHS-align  
509 ([nature.njit.edu/biosoft/CHSalign/](http://nature.njit.edu/biosoft/CHSalign/)).

510

511 **Statistical Analysis**

512 Fisher exact test was used to compare the proportion of subjects with specific sub-genomic  
513 RNA transcripts. P values less than 0.05 was used as the statistical threshold. Comparisons  
514 between sub-genomic and genomic RNA expression in R203/G204 compared to K203/R204  
515 containing sequences was made using the Mann-Whitney U test, corrected for multiple  
516 comparisons using the Holm method. Logistic and linear regression modeling used to explore  
517 the impact of K203/R204 and other co-variates on hospitalization, CT values and sub-  
518 genomic RNA expression.

519

520 **Declarations**

521 Ethics approval and consent to participate (COG-UK CONSORTIUM; R&D NR0195).

522

523 **Consent for publication**

524 Not applicable.

525

526 **Availability of data and materials**

527 All data generated or analysed during this study are included in this published article and its  
528 supplementary information files.

529

530 **Competing interests**

531 The authors declare that they have no competing interests.

532

533 **Funding**

534 SG, SL and EA were supported by a grant awarded by the National Health and Medical  
535 Research Council (NHMRC; APP1148284). SM was supported by a National Institutes of

536 Health (NIH)-funded Tennessee Center for AIDS Research (P30 AI110527). MDP was  
537 funded by the NIHR Sheffield Biomedical Research Centre (BRC - IS-BRC-1215-20017).  
538 Sequencing of SARS-CoV-2 samples was undertaken by the Sheffield COVID-19 Genomics  
539 Group as part of the COG-UK CONSORTIUM. COG-UK and supported by funding from  
540 the Medical Research Council (MRC) part of UK Research & Innovation (UKRI), the  
541 National Institute of Health Research (NIHR) and Genome Research Limited, operating as  
542 the Wellcome Sanger Institute. TIdS is supported by a Wellcome Trust Intermediate Clinical  
543 Fellowship (110058/Z/15/Z).

544

#### 545 **Authors' contributions**

546 SL, SG, SM, EP, AC and MJ were involved in original conception and design of study, and  
547 writing of the manuscript. IJ performed the statistical analyses. SP and SD provided data on  
548 the metagenomic analysis. MSS, DO and JLB contributed to specific analyses relating to  
549 RNA/protein structures and writing of the manuscript. MP, BL and TdS contributed to the  
550 analyses of sub-genomic RNA and clinical metadata for the Sheffield dataset and writing of  
551 the manuscript.

552

#### 553 **Acknowledgments**

554 We thank colleagues at the Institute for Immunology and Infectious Diseases, Murdoch  
555 University, Australia and the Department of Medicine, Division of Infectious Diseases,  
556 Vanderbilt University Medical Center, USA. We would like to acknowledge additional  
557 members of the Sheffield COVID-19 Genomic Group who contributed to the generation of  
558 the sequence data: Adrienne Angyal, Rebecca L. Brown, Laura Carrilero, Cariad M Evans,  
559 Luke R. Green, Danielle C. Groves, Katie J Johnson, Paul J Parsons, David Partridge,  
560 Mohammad Raza, Rachel M. Tucker, Dennis Wang, Matthew D. Wyles.



561

562 **References:**

563

564 1. Zhang T, Wu Q, Zhang Z. Probable Pangolin Origin of SARS-CoV-2 Associated with  
565 the COVID-19 Outbreak. *Curr Biol.* 2020;30(7):1346-51 e2.

566 2. Korber B, Fischer WM, Gnanakaran S, Yoon H, Theiler J, Abfalterer W, et al.  
567 Tracking Changes in SARS-CoV-2 Spike: Evidence that D614G Increases Infectivity of the  
568 COVID-19 Virus. *Cell.* 2020.

569 3. Grubaugh ND, Hanage WP, Rasmussen AL. Making Sense of Mutation: What  
570 D614G Means for the COVID-19 Pandemic Remains Unclear. *Cell.* 2020.

571 4. Yurkovetskiy L, Pascal KE, Tompkins-Tinch C, Nyalile T, Wang Y, Baum A, et al.  
572 SARS-CoV-2 Spike protein variant D614G increases infectivity and retains sensitivity to  
573 antibodies that target the receptor binding domain. *bioRxiv.* 2020.

574 5. Zhang L, Jackson CB, Mou H, Ojha A, Rangarajan ES, IZard T, et al. The D614G  
575 mutation in the SARS-CoV-2 spike protein reduces S1 shedding and increases infectivity.  
576 *bioRxiv.* 2020.

577 6. Graham RL, Baric RS. Recombination, reservoirs, and the modular spike:  
578 mechanisms of coronavirus cross-species transmission. *J Virol.* 2010;84(7):3134-46.

579 7. Ji W, Wang W, Zhao X, Zai J, Li X. Cross-species transmission of the newly  
580 identified coronavirus 2019-nCoV. *J Med Virol.* 2020;92(4):433-40.

581 8. Jenjaroenpun P, Wanchai V, Ono-Moore KD, Laudadio J, James LP, Adams SH, et  
582 al. Two SARS-CoV-2 Genome Sequences of Isolates from Rural U.S. Patients Harboring the  
583 D614G Mutation, Obtained Using Nanopore Sequencing. *Microbiol Resour Announc.*  
584 2020;10(1).

- 585 9. Franco-Muñoz C, Álvarez-Díaz DA, Laiton-Donato K, Wiesner M, Escandón P,  
586 Usme-Ciro JA, et al. Substitutions in Spike and Nucleocapsid proteins of SARS-CoV-2  
587 circulating in South America. *Infect Genet Evol.* 2020;85:104557-.
- 588 10. Leslie A, Kavanagh D, Honeyborne I, Pfafferott K, Edwards C, Pillay T, et al.  
589 Transmission and accumulation of CTL escape variants drive negative associations between  
590 HIV polymorphisms and HLA. *J Exp Med.* 2005;201(6):891-902.
- 591 11. Leslie AJ, Pfafferott KJ, Chetty P, Draenert R, Addo MM, Feeney M, et al. HIV  
592 evolution: CTL escape mutation and reversion after transmission. *Nat Med.* 2004;10(3):282-  
593 9.
- 594 12. Moore CB, John M, James IR, Christiansen FT, Witt CS, Mallal SA. Evidence of  
595 HIV-1 adaptation to HLA-restricted immune responses at a population level. *Science.*  
596 2002;296(5572):1439-43.
- 597 13. Fitzmaurice K, Petrovic D, Ramamurthy N, Simmons R, Merani S, Gaudieri S, et al.  
598 Molecular footprints reveal the impact of the protective HLA-A\*03 allele in hepatitis C virus  
599 infection. *Gut.* 2011;60(11):1563-71.
- 600 14. Rubnitz J, Subramani S. The minimum amount of homology required for homologous  
601 recombination in mammalian cells. *Mol Cell Biol.* 1984;4(11):2253-8.
- 602 15. Sola I, Moreno JL, Zuniga S, Alonso S, Enjuanes L. Role of nucleotides immediately  
603 flanking the transcription-regulating sequence core in coronavirus subgenomic mRNA  
604 synthesis. *J Virol.* 2005;79(4):2506-16.
- 605 16. Parker MD, Lindsey BB, Leary S, Gaudieri S, Chopra A, Wyles M, et al. periscope:  
606 sub-genomic RNA identification in SARS-CoV-2 Genomic Sequencing Data. *bioRxiv.*  
607 2020:2020.07.01.181867.
- 608 17. Kim D, Lee JY, Yang JS, Kim JW, Kim VN, Chang H. The Architecture of SARS-  
609 CoV-2 Transcriptome. *Cell.* 2020;181(4):914-21 e10.

- 610 18. Lorenz R, Bernhart SH, Honer Zu Siederdisen C, Tafer H, Flamm C, Stadler PF, et  
611 al. ViennaRNA Package 2.0. Algorithms for molecular biology : AMB. 2011;6:26.
- 612 19. Laing C, Wen D, Wang JT, Schlick T. Predicting coaxial helical stacking in RNA  
613 junctions. Nucleic acids research. 2012;40(2):487-98.
- 614 20. de la Pena M, Dufour D, Gallego J. Three-way RNA junctions with remote tertiary  
615 contacts: a recurrent and highly versatile fold. Rna. 2009;15(11):1949-64.
- 616 21. Hua L, Song Y, Kim N, Laing C, Wang JT, Schlick T. CHSalign: A Web Server That  
617 Builds upon Junction-Explorer and RNAJAG for Pairwise Alignment of RNA Secondary  
618 Structures with Coaxial Helical Stacking. PloS one. 2016;11(1):e0147097.
- 619 22. Chapman EG, Moon SL, Wilusz J, Kieft JS. RNA structures that resist degradation by  
620 Xrn1 produce a pathogenic Dengue virus RNA. eLife. 2014;3:e01892.
- 621 23. Gaudieri S, Rauch A, Park LP, Freitas E, Herrmann S, Jeffrey G, et al. Evidence of  
622 viral adaptation to HLA class I-restricted immune pressure in chronic hepatitis C virus  
623 infection. J Virol. 2006;80(22):11094-104.
- 624 24. Brumme ZL, Kinloch NN, Sanche S, Wong A, Martin E, Cobarrubias KD, et al.  
625 Extensive host immune adaptation in a concentrated North American HIV epidemic. AIDS.  
626 2018;32(14):1927-38.
- 627 25. Katoh J, Kawana-Tachikawa A, Shimizu A, Zhu D, Han C, Nakamura H, et al. Rapid  
628 HIV-1 Disease Progression in Individuals Infected with a Virus Adapted to Its Host  
629 Population. PLoS One. 2016;11(3):e0150397.
- 630 26. Peng H, Yang LT, Wang LY, Li J, Huang J, Lu ZQ, et al. Long-lived memory T  
631 lymphocyte responses against SARS coronavirus nucleocapsid protein in SARS-recovered  
632 patients. Virology. 2006;351(2):466-75.
- 633 27. Yang Y, Yan W, Hall B, Jiang X. Characterizing transcriptional regulatory sequences  
634 in coronaviruses and their role in recombination. bioRxiv. 2020.

- 635 28. Sola I, Almazan F, Zuniga S, Enjuanes L. Continuous and Discontinuous RNA  
636 Synthesis in Coronaviruses. *Annual review of virology*. 2015;2(1):265-88.
- 637 29. Kopecky-Bromberg SA, Martinez-Sobrido L, Frieman M, Baric RA, Palese P. Severe  
638 acute respiratory syndrome coronavirus open reading frame (ORF) 3b, ORF 6, and  
639 nucleocapsid proteins function as interferon antagonists. *Journal of virology*. 2007;81(2):548-  
640 57.
- 641 30. Lokugamage KG, Hage A, Schindewolf C, Rajsbaum R, Menachery VD. SARS-  
642 CoV-2 is sensitive to type I interferon pretreatment. *bioRxiv*. 2020.
- 643 31. Hu Y, Li W, Gao T, Cui Y, Jin Y, Li P, et al. The Severe Acute Respiratory  
644 Syndrome Coronavirus Nucleocapsid Inhibits Type I Interferon Production by Interfering  
645 with TRIM25-Mediated RIG-I Ubiquitination. *Journal of virology*. 2017;91(8).
- 646 32. Manokaran G, Finol E, Wang C, Gunaratne J, Bahl J, Ong EZ, et al. Dengue  
647 subgenomic RNA binds TRIM25 to inhibit interferon expression for epidemiological fitness.  
648 *Science*. 2015;350(6257):217-21.
- 649 33. Zuniga S, Cruz JL, Sola I, Mateos-Gomez PA, Palacio L, Enjuanes L. Coronavirus  
650 nucleocapsid protein facilitates template switching and is required for efficient transcription.  
651 *Journal of virology*. 2010;84(4):2169-75.
- 652 34. Sidney J, Southwood S, Moore C, Oseroff C, Pinilla C, Grey HM, et al. Measurement  
653 of MHC/peptide interactions by gel filtration or monoclonal antibody capture. *Curr Protoc*  
654 *Immunol*. 2013;Chapter 18:Unit 18 3.
- 655 35. Sidney J, del Guercio MF, Southwood S, Engelhard VH, Appella E, Rammensee HG,  
656 et al. Several HLA alleles share overlapping peptide specificities. *Journal of immunology*.  
657 1995;154(1):247-59.

658

659 **Fig legends**

660 **Fig 1. Proportion of weekly deposited SARS-CoV-2 sequences by region.** The D614G  
661 (B.1) variant has become the dominant form globally. The proportion of R203/G204 to  
662 K203/R204 sub-variants of the D614G variant differs in different regions with recent  
663 increases in the frequency of new variants. D\_RG = D614/R203/G204; G\_RG =  
664 G614/R203/G204; G\_KR (B1.1) = G614/K203/R204; G\_KR (B.1.1.7) = 'UK variant'; and  
665 G\_RG (B.1.351) = 'South African variant'. Note due to low numbers of the P.1. 'Brazilian  
666 variant' in the database this variant is part of the G\_KR group.

667

668 **Fig 2. The configuration of canonical sgRNAs and the novel non-canonical nucleocapsid**  
669 **sgRNA (N\*) in SARS-CoV-2.** The bottom bar illustrates the presence of the leader sequence  
670 (blue text) followed by the transcription-regulating sequence (TRS; red text) within the  
671 genomic sequence that continues into the first ORF 1a. The presence of canonical sgRNA  
672 transcripts in which the leader sequence and TRS precede the start codon (methionine; pink)  
673 of the other proteins are shown. The presence of the novel non-canonical sgRNA transcript  
674 containing the K203/R204 polymorphisms (N\*) is shown. The ARTIC primer locations and  
675 resultant amplicons are shown.

676

677 **Fig 3. Exploration of sub-genomic RNA in 981 samples from Sheffield, UK.** A. A  
678 heatmap showing presence or absence of sub-genomic RNA from different ORFs.  
679 K203/R204 (KR)-containing sequences have evidence of the novel truncated N ORF sub-  
680 genomic RNA (N\*, red, 233/553, 42%). An ORF sgRNA was deemed present if we could  
681 find  $\geq 1$  read in support. Heatmap is ordered by the presence or absence of the novel sub-  
682 genomic RNA. There were a total of 448 R203/G204 (RG)-containing sequences and 1 had

683 evidence of a novel sgRNA (likely false positive, Fig S2). **B.** Significantly higher (Mann-  
684 Whitney U  $p < 2.2e-16$ ) total sub-genomic RNA in KR-containing compared to RG-  
685 containing sequences. **C.** Sub-genomic RNA is significant increased in KR-containing  
686 compared to RG-containing sequences for a number of ORFs, most notably nucleocapsid (N;  
687 Mann-Whitney U  $p = 2.06e-37$  corrected for multiple testing using the Holm method). Y-axis  
688 denotes square root transformed sub-genomic reads normalized to 100,000 genomic reads  
689 from the same ARTIC amplicon. **D.** There is no difference in genomic RNA levels  
690 (normalized to total mapped reads) between KR- and RG-containing sequences. \*novel sub-  
691 genomic RNA and ORF1a, 1b and ORF10 are excluded from this analysis because they are  
692 not expressed, and the novel truncated N sub-genomic RNA is only present in KR-containing  
693 sequences. \*\*\*  $< 0.001$ , \*\*  $< 0.01$ , \*  $< 0.05$ . All p values shown are following correction for  
694 multiple testing with the Holm method.

695

696 **Fig 4. Spike 614 and Nucleocapsid 203/204 Status, Diagnostic Metrics and level of sub-**  
697 **genomic and genomic RNA. A.** E gene cycle threshold (CT) normalized to RNaseP CT  
698 stratified by variant status in N = 478 individuals from Sheffield dataset with day of symptom  
699 onset data available. This normalization was done to combine and display E gene CT data  
700 from two different extraction protocols. Y-axis reversed to aid interpretation, as lower  
701 normalized CT values equal higher virus levels. **B.** Normalized E gene CT vs the day of  
702 sampling from day of symptom onset. P values provided are from a generalized multivariable  
703 linear regression model (GLM) for the difference in normalized E gene CT value between  
704 samples containing each variant, with extraction method and day of illness included in the  
705 model (S6 Table) **C.** Normalized (per 1000 genomic reads) sub-genomic RNA levels for

706 ORFs S and N. **D.** Normalized (per 100,000 mapped reads) genomic RNA levels for ORFs S

707 and N.

708

709

## Figures

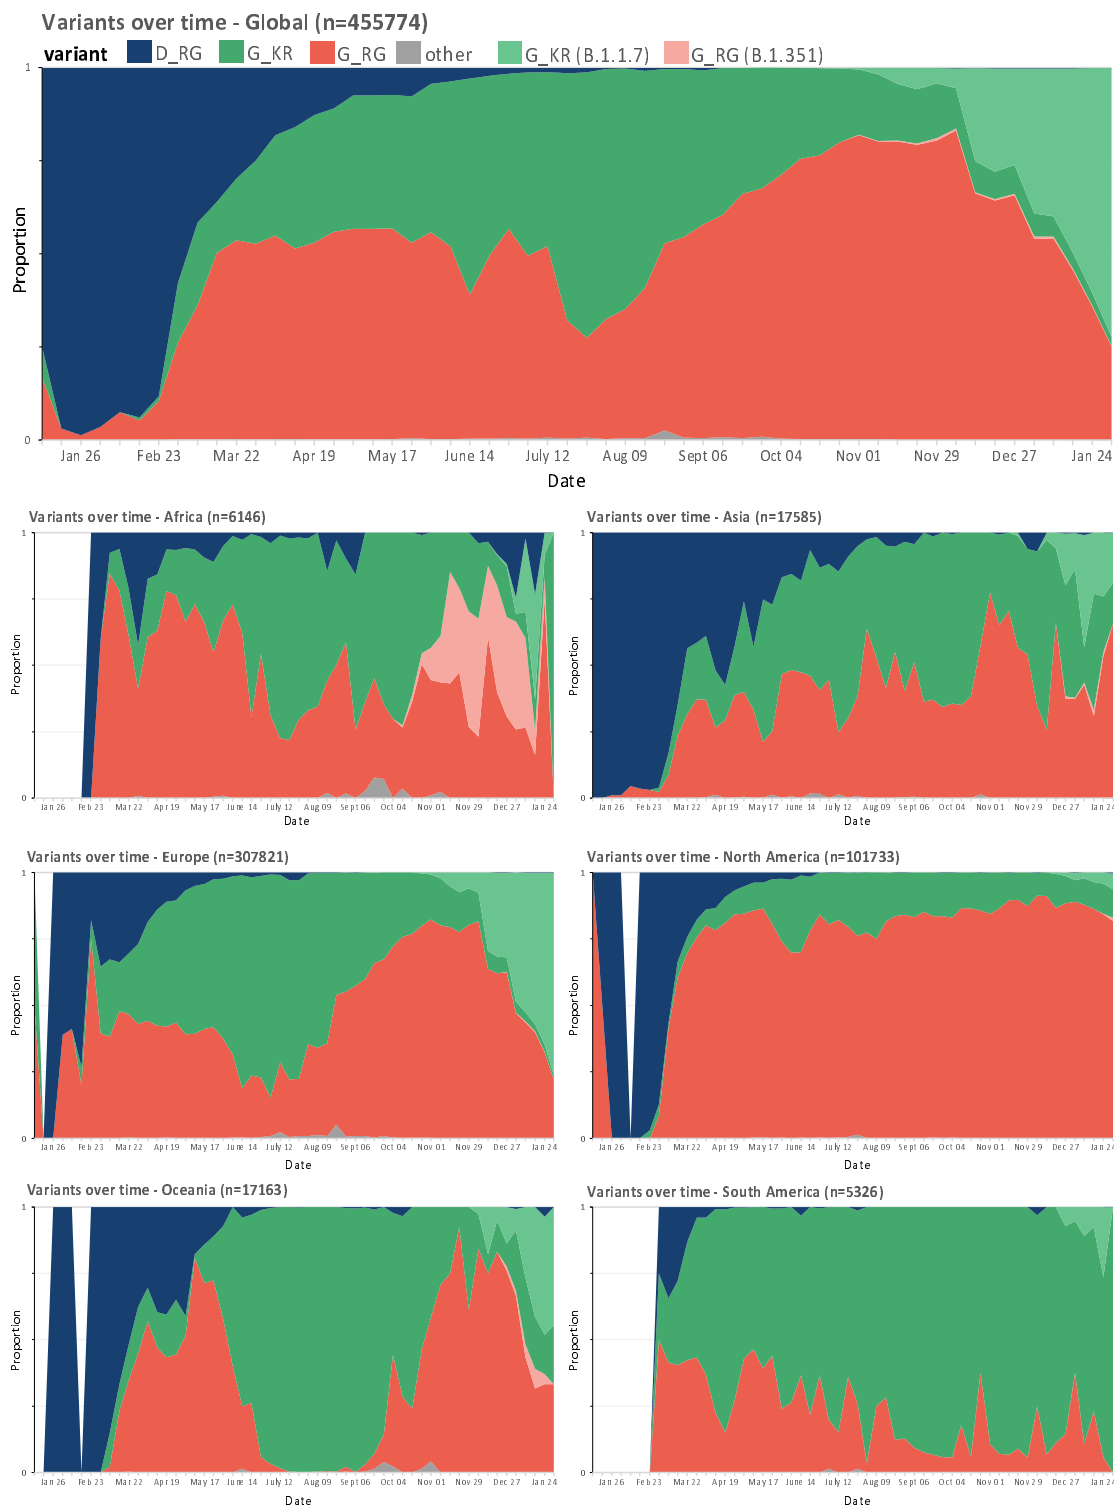

**Fig 1. Proportion of weekly deposited SARS-CoV-2 sequences by region.** The D614G (B.1) variant has become the dominant form globally. The proportion of R203/G204 to K203/R204 sub-variants of the



D614G variant differs in different regions with recent increases in the frequency of new variants. D\_RG = D614/R203/G204; G\_RG = G614/R203/G204; G\_KR (B.1.1) = G614/K203/R204; G\_KR (B.1.1.7) = 'UK variant'; and G\_RG (B.1.351) = 'South African variant'. Note due to low numbers of the P.1. 'Brazilian variant' in the database this variant is part of the G\_KR group.

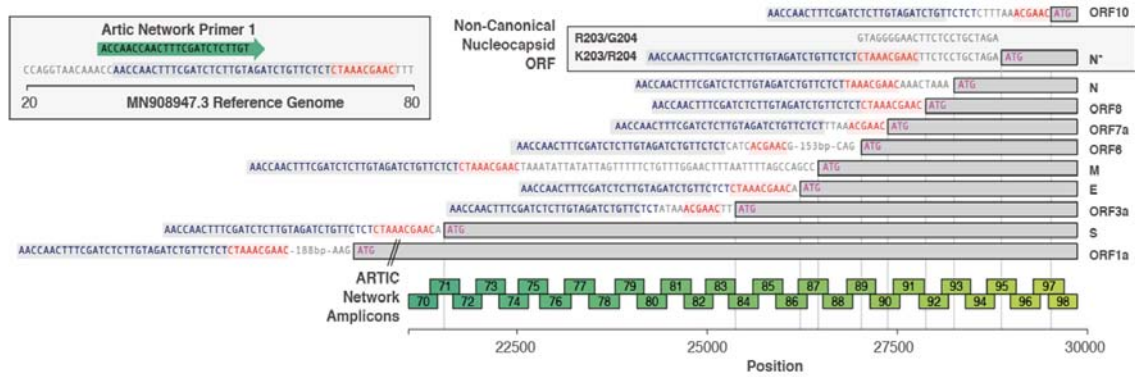

**Fig 2. The configuration of canonical sgRNAs and the novel non-canonical nucleocapsid sgRNA (N\*) in SARS-CoV-2.** The bottom bar illustrates the presence of the leader sequence (blue text) followed by the transcription-regulating sequence (TRS; red text) within the genomic sequence that continues into the first ORF 1a. The presence of other canonical sgRNA transcripts in which the leader sequence and TRS precede the start codon (methionine; pink) of the other proteins are shown. The presence of the novel non-canonical sgRNA transcript containing the K203/R204 polymorphisms (N\*) is shown. The ARTIC primer locations and resultant amplicons are shown.

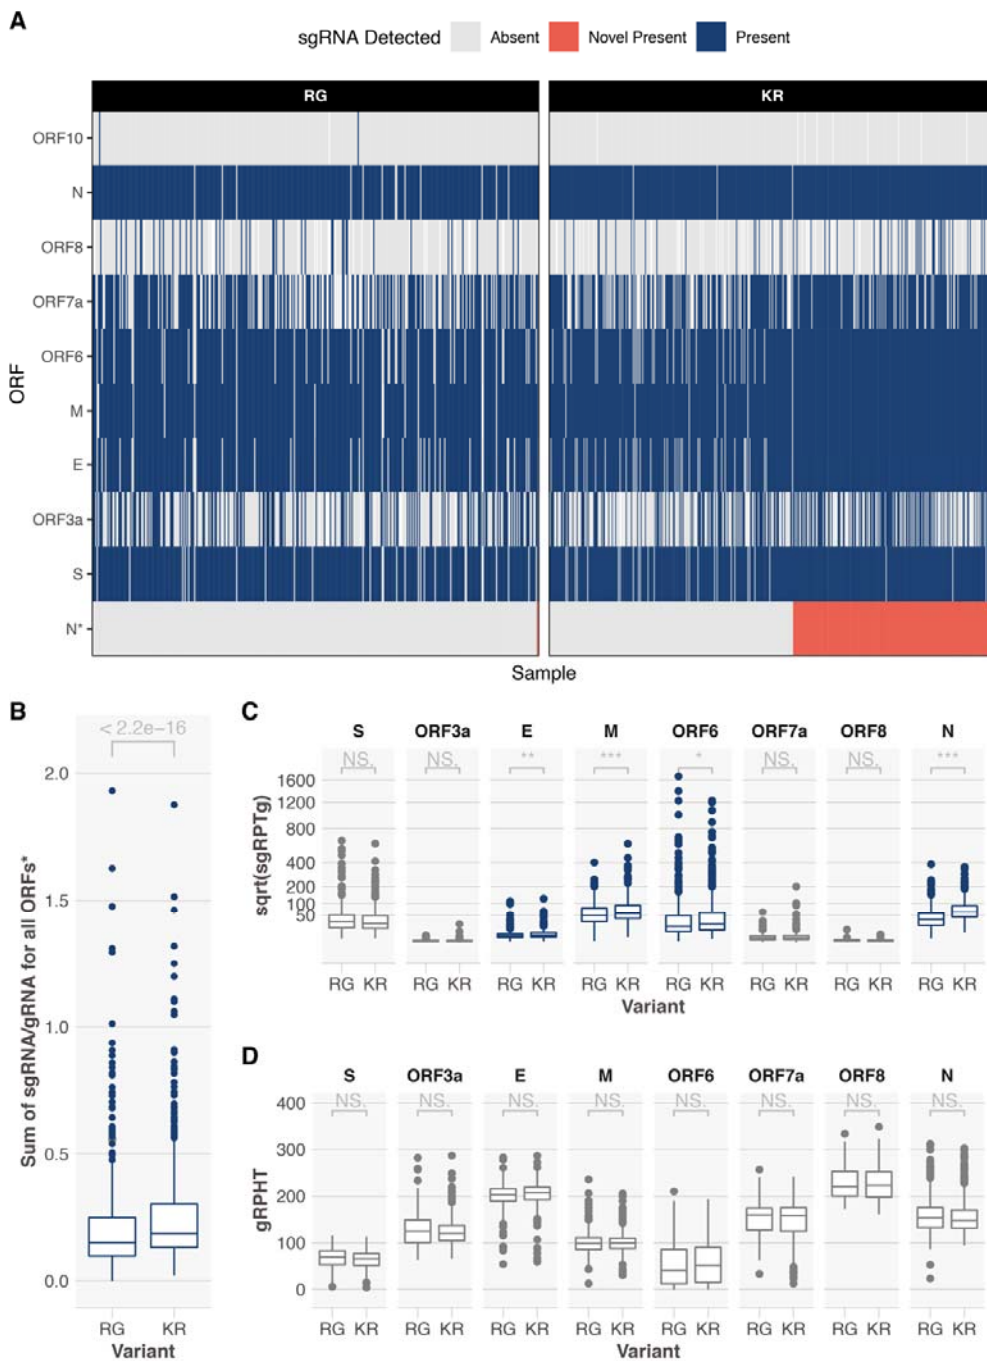

**Fig 3. Exploration of sgRNAs in 981 samples from Sheffield, UK.** **A.** A heatmap showing presence or absence of sgRNAs from different ORFs. K203/R204 (KR)-containing sequences have evidence of the novel truncated N ORF sgRNA (N\*, red, 233/553, 42%). An ORF sgRNA was deemed present if we could find  $\geq 1$  read in support. Heatmap is ordered by the presence or absence of the novel sgRNA. There were a total of 448 R203/G204 (RG)-containing sequences and 1 had evidence of a novel sgRNA (likely false positive, Fig S2). **B.** Significantly higher (Mann-Whitney U  $p < 2.2e-16$ ) total sgRNA in KR-containing

compared to RG-containing sequences. **C.** Sub-genomic RNA is significant increased in KR-containing compared to RG-containing sequences for a number of ORFs, most notably nucleocapsid (N; Mann-Whitney U  $p = 2.06e-37$  corrected for multiple testing using the Holm method). Y-axis denotes square root transformed sub-genomic reads normalized to 100,000 genomic reads from the same ARTIC amplicon. **D.** There is no difference in genomic RNA levels (normalized to total mapped reads) between KR- and RG-containing sequences. \*novel sgRNA, ORF10 and ORF1a are excluded from this analysis due to ORF10 not being expressed, difficulty in discriminating ORF1a sgRNA from genomic RNA and the novel truncated N sgRNA is only being present in KR-containing sequences. \*\*\* < **0.001**, \*\* < **0.01**, \* < **0.05**. All p values shown are following correction for multiple testing with the Holm method.

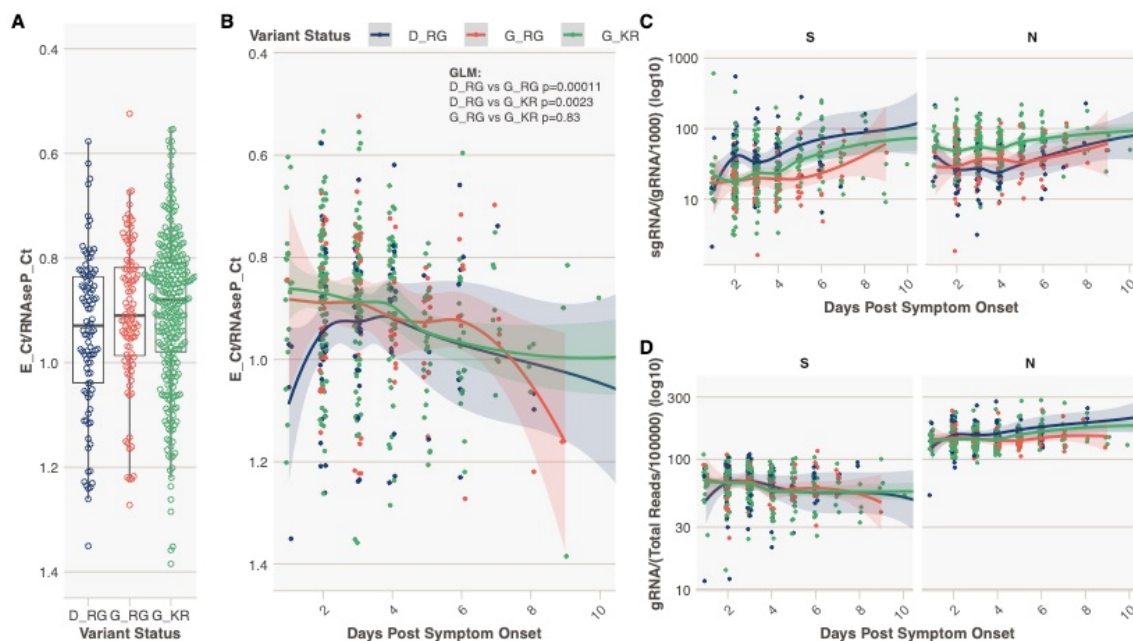

**Fig 4. Spike 614 and Nucleocapsid 203/204 Status, Diagnostic Metrics and level of sub-genomic and genomic RNA.** **A.** E gene cycle threshold (CT) normalized to RNaseP CT stratified by variant status in N = 478 individuals from Sheffield dataset with day of symptom onset data available. This normalization was done to combine and display E gene CT data from two different extraction protocols. Y-axis reversed to aid interpretation, as lower normalized CT values equal higher virus levels. **B.** Normalized E gene CT vs the day of sampling from day of symptom onset. P values provided are from a generalized multivariable linear regression model (GLM) for the difference in normalized E gene CT value between samples containing each variant, with extraction method and day of illness included in the model (Table S6) **C.** Normalized (per 1000 genomic reads) sgRNA levels for ORFs S and N. **D.** Normalized (per 100,000 mapped reads) genomic RNA levels for ORFs S and N.
